# Supplementary material
Source: MDPI journal article supplement (https://www.mdpi.com/2072-4292/15/18/4491)
Supplement: s1 [file s1]

**Table S1.** Post hoc analysis of the means of  $C_{mean}$  values in soils of traditional soil map (significant differences are shown in red).

| Soils | Approximate Probabilities ( $p$ -Values) for Post Hoc Test * |                   |                   |                   |                   |
|-------|--------------------------------------------------------------|-------------------|-------------------|-------------------|-------------------|
|       | 1                                                            | 2                 | 3                 | 4                 | 5                 |
|       | mean =<br>0.14009                                            | mean =<br>0.14714 | mean =<br>0.14968 | mean =<br>0.15430 | mean =<br>0.16013 |
| 1     |                                                              | 0.000017          | 0.000017          | 0.000017          | 0.000017          |
| 2     | 0.000017                                                     |                   | 0.000017          | 0.000017          | 0.000017          |
| 3     | 0.000017                                                     | 0.000017          |                   | 0.000017          | 0.000017          |
| 4     | 0.000017                                                     | 0.000017          | 0.000017          |                   | 0.000017          |
| 5     | 0.000017                                                     | 0.000017          | 0.000017          | 0.000017          |                   |

\* Error: Between groups MS = 0.00004, ds = 24251.

**Table S2.** Post hoc analysis of the means of OM content in soils of traditional soil map (significant differences are shown in red).

| Soils | Approximate Probabilities ( $p$ -Values) for Post Hoc Test * |                  |                  |                  |                  |
|-------|--------------------------------------------------------------|------------------|------------------|------------------|------------------|
|       | 1                                                            | 2                | 3                | 4                | 5                |
|       | mean =<br>4.5833                                             | mean =<br>4.5769 | mean =<br>4.0265 | mean =<br>3.5933 | mean =<br>3.0750 |
| 1     |                                                              | 1.000000         | 0.175220         | 0.004366         | 0.000158         |
| 2     | 1.000000                                                     |                  | 0.028544         | 0.000260         | 0.000125         |
| 3     | 0.175220                                                     | 0.028544         |                  | 0.103248         | 0.000574         |
| 4     | 0.004366                                                     | 0.000260         | 0.103248         |                  | 0.225562         |
| 5     | 0.000158                                                     | 0.000125         | 0.000574         | 0.225562         |                  |

\* Error: Between groups MS = 0.31355, ds = 71.00.

**Table S3.** Post hoc analysis of the means of thickness of humus horizon in soils of traditional soil map (significant differences are shown in red).

| Soils | Approximate Probabilities ( $p$ -Values) for Post Hoc Test* |                  |                  |                  |                  |
|-------|-------------------------------------------------------------|------------------|------------------|------------------|------------------|
|       | 1                                                           | 2                | 3                | 4                | 5                |
|       | mean =<br>83.500                                            | mean =<br>81.308 | mean =<br>63.824 | mean =<br>52.467 | mean =<br>36.625 |
| 1     |                                                             | 0.997977         | 0.022203         | 0.000359         | 0.000125         |
| 2     | 0.997977                                                    |                  | 0.003324         | 0.000133         | 0.000125         |
| 3     | 0.022203                                                    | 0.003324         |                  | 0.088846         | 0.000185         |
| 4     | 0.000359                                                    | 0.000133         | 0.088846         |                  | 0.095542         |
| 5     | 0.000125                                                    | 0.000125         | 0.000185         | 0.095542         |                  |

\* Error: Between groups MS = 204.57, ds = 71.00.

**Table S4.** Post hoc analysis of the means of OM content in soil varieties of SIC "C" map (significant differences are shown in red).

| Soils | Approximate Probabilities ( <i>p</i> -Values) for Post Hoc Test * |                  |                  |                  |                  |                  |                  |
|-------|-------------------------------------------------------------------|------------------|------------------|------------------|------------------|------------------|------------------|
|       | 1                                                                 | 2                | 3                | 4                | 5                | 6                | 7                |
|       | mean =<br>4.5375                                                  | mean =<br>4.3857 | mean =<br>4.8500 | mean =<br>4.3524 | mean =<br>3.5667 | mean =<br>3.0667 | mean =<br>2.8250 |
| 1     |                                                                   | 0.962913         | 0.410283         | 0.777180         | 0.000127         | 0.000127         | 0.000127         |
| 2     | 0.962913                                                          |                  | 0.070294         | 0.999981         | 0.000128         | 0.000127         | 0.000127         |
| 3     | 0.410283                                                          | 0.070294         |                  | 0.004376         | 0.000127         | 0.000127         | 0.000127         |
| 4     | 0.777180                                                          | 0.999981         | 0.004376         |                  | 0.000127         | 0.000127         | 0.000127         |
| 5     | 0.000127                                                          | 0.000128         | 0.000127         | 0.000127         |                  | 0.016864         | 0.000132         |
| 6     | 0.000127                                                          | 0.000127         | 0.000127         | 0.000127         | 0.016864         |                  | 0.773709         |
| 7     | 0.000127                                                          | 0.000127         | 0.000127         | 0.000127         | 0.000132         | 0.773709         |                  |

\* Error: Between groups MS = 0.09548, ds = 69.00.

**Table S5.** Post hoc analysis of the means of thickness of humus horizon in soil varieties of SIC "C" map (significant differences are shown in red).

| Soils | Approximate Probabilities ( <i>p</i> -Values) for Post Hoc Test * |                  |                  |                  |                  |                  |                  |
|-------|-------------------------------------------------------------------|------------------|------------------|------------------|------------------|------------------|------------------|
|       | 1                                                                 | 2                | 3                | 4                | 5                | 6                | 7                |
|       | mean =<br>86.375                                                  | mean =<br>87.143 | mean =<br>84.625 | mean =<br>65.476 | mean =<br>53.778 | mean =<br>42.500 | mean =<br>29.000 |
| 1     |                                                                   | 0.999990         | 0.998400         | 0.000127         | 0.000127         | 0.000127         | 0.000127         |
| 2     | 0.999990                                                          |                  | 0.990018         | 0.000127         | 0.000127         | 0.000127         | 0.000127         |
| 3     | 0.998400                                                          | 0.990018         |                  | 0.000127         | 0.000127         | 0.000127         | 0.000127         |
| 4     | 0.000127                                                          | 0.000127         | 0.000127         |                  | 0.000137         | 0.000127         | 0.000127         |
| 5     | 0.000127                                                          | 0.000127         | 0.000127         | 0.000137         |                  | 0.010039         | 0.000127         |
| 6     | 0.000127                                                          | 0.000127         | 0.000127         | 0.000127         | 0.010039         |                  | 0.006104         |
| 7     | 0.000127                                                          | 0.000127         | 0.000127         | 0.000127         | 0.000127         | 0.006104         |                  |

\* Error: Between groups MS = 47.978, ds = 69.00.
